# Supplementary material for: Steroid-Sparing Effect of Tocilizumab and Methotrexate in Patients with Polymyalgia Rheumatica: A Retrospective Cohort Study
Source: MDPI journal article supplement (doi:10.3390/jcm10132948), 2021-06-30
Supplement: s1 [file s1]

## Supplementary Material

**Table S1. Comorbidities of the patients in the three groups at the last follow-up**

|                                                    | <b>Prednisolone group</b> | <b>Methotrexate group</b> | <b>Tocilizumab group</b> |
|----------------------------------------------------|---------------------------|---------------------------|--------------------------|
|                                                    | (n=177)                   | (n=32)                    | (n=15)                   |
| <b>Glucocorticoid-related comorbidities, N (%)</b> | 136 (76.8)                | 24 (75.0)                 | 13 (86.7)                |
| <b>Osteoporosis*, N (%)</b>                        | 102 (68.9) <sup>¶</sup>   | 21 (72.4) <sup>¶</sup>    | 12 (85.7) <sup>¶</sup>   |
| <b>Diabetes mellitus, N (%)</b>                    | 45 (25.4)                 | 9 (28.1)                  | 2 (13.3)                 |
| <b>Hypertension, N (%)</b>                         | 65 (36.7)                 | 11 (34.4)                 | 8 (53.3)                 |
| <b>Dyslipidemia, N (%)</b>                         | 51 (28.8)                 | 8 (25.0)                  | 1 (6.67)                 |

\*Young adult mean bone mineral density < 70% (equivalent to T-score < -2.5)

<sup>¶</sup>Data of bone mineral density were available in 148 patients of the prednisolone group, 29 of the methotrexate group, and 14 of the tocilizumab

group.

**Table S2A. Prednisolone dose and discontinuation of prednisolone at the last follow-up of the patients in the tocilizumab and prednisolone groups with propensity score matching for disease duration and initial dose of prednisolone**

|                                                            | <b>TCZ<br/>(n=13)</b> | <b>PSL<br/>(n=13)</b> | <b>p</b> |
|------------------------------------------------------------|-----------------------|-----------------------|----------|
| <b>PSL dose at the last follow-up, mg/day</b>              | 0                     | 5 (0.3-6.8)           | 0.001*   |
| <b>Discontinuation of PSL at the last follow-up, N (%)</b> | 11 (84.6%)            | 3 (23.1%)             | 0.005*   |

PSL, prednisolone; TCZ, tocilizumab.

An asterisk shows statistical significance ( $P < 0.05$ ).

**Table S2B. Prednisolone dose and discontinuation of prednisolone at the last follow-up of the patients in the tocilizumab and methotrexate groups with propensity score matching for disease duration and initial dose of**

**prednisolone**

|                                                            | <b>TCZ<br/>(n=8)</b> | <b>MTX<br/>(n=8)</b> | <b>p</b> |
|------------------------------------------------------------|----------------------|----------------------|----------|
| <b>PSL dose at the last follow-up, mg/day</b>              | 0                    | 3 (1.6-4.8)          | 0.006*   |
| <b>Discontinuation of PSL at the last follow-up, N (%)</b> | 7 (87.5%)            | 1 (12.5%)            | 0.01*    |

MTX, methotrexate; TCZ, tocilizumab.

An asterisk shows statistical significance ( $P < 0.05$ ).

**Table 2C. Prednisolone dose and discontinuation of prednisolone at the last follow-up of the patients in the prednisolone and methotrexate groups with propensity score matching for disease duration and initial dose of prednisolone**

|                                                            | <b>PSL<br/>(n=26)</b> | <b>MTX<br/>(n=26)</b> | <b>p</b> |
|------------------------------------------------------------|-----------------------|-----------------------|----------|
| <b>PSL dose at the last follow-up, mg/day</b>              | 3 (1.1-5.3)           | 3 (1.3-6.0)           | 0.87     |
| <b>Discontinuation of PSL at the last follow-up, N (%)</b> | 6 (23.1%)             | 5 (19.2%)             | 1.00     |

PSL, prednisolone; MTX, methotrexate.
